# Supplementary material
Source: MDPI journal article supplement (https://www.mdpi.com/2073-4395/13/3/687)
Supplement: s1 [file s1]

**Table S1.** Correlation coefficients between the first two PCs and the variables included in PCAcon, PCAiws, and PCAsws

|                               | PCAcon | PCAiws | PCAsws |       |       |       |       |       |       |       |       |       |
|-------------------------------|--------|--------|--------|-------|-------|-------|-------|-------|-------|-------|-------|-------|
|                               | PC1    | PC2    | PC1    | PC2   | PC1   | PC2   |       |       |       |       |       |       |
|                               | R      | p      | R      | p     | R     | p     | R     | p     | R     | p     | R     | p     |
| <i>Quantitative variables</i> |        |        |        |       |       |       |       |       |       |       |       |       |
| <b>Caro</b>                   | 0.69   | 0.000  | 0.59   | 0.001 | 0.29  | 0.114 | 0.68  | 0.000 | 0.16  | 0.399 | -0.36 | 0.048 |
| <b>Chl a</b>                  | 0.61   | 0.000  | 0.66   | 0.000 | 0.28  | 0.132 | 0.90  | 0.000 | 0.71  | 0.000 | -0.56 | 0.001 |
| <b>Chl b</b>                  | 0.61   | 0.000  | 0.60   | 0.000 | 0.32  | 0.088 | 0.78  | 0.000 | 0.62  | 0.000 | -0.64 | 0.000 |
| <b>DW<sub>r</sub></b>         | -0.23  | 0.226  | 0.63   | 0.000 | 0.80  | 0.000 | -0.28 | 0.135 | 0.40  | 0.029 | 0.51  | 0.004 |
| <b>DW<sub>s</sub></b>         | -0.69  | 0.000  | 0.58   | 0.001 | 0.80  | 0.000 | -0.33 | 0.076 | 0.05  | 0.778 | 0.42  | 0.019 |
| <b>FW<sub>r</sub></b>         | -0.01  | 0.975  | 0.42   | 0.022 | 0.76  | 0.000 | -0.33 | 0.074 | 0.73  | 0.000 | 0.27  | 0.153 |
| <b>FW<sub>s</sub></b>         | -0.54  | 0.002  | 0.38   | 0.041 | 0.83  | 0.000 | 0.32  | 0.083 | 0.81  | 0.000 | 0.42  | 0.021 |
| <b>Ln</b>                     | 0.08   | 0.691  | 0.05   | 0.801 | 0.60  | 0.000 | -0.06 | 0.765 | 0.32  | 0.083 | 0.07  | 0.730 |
| <b>MDA</b>                    | 0.25   | 0.190  | 0.03   | 0.893 | 0.08  | 0.677 | 0.64  | 0.000 | 0.40  | 0.027 | -0.37 | 0.044 |
| <b>PRO</b>                    | 0.06   | 0.754  | 0.48   | 0.008 | 0.45  | 0.013 | -0.42 | 0.021 | 0.49  | 0.006 | -0.26 | 0.160 |
| <b>RL</b>                     | -0.36  | 0.054  | -0.02  | 0.924 | 0.10  | 0.588 | -0.20 | 0.294 | 0.59  | 0.001 | 0.52  | 0.003 |
| <b>SL</b>                     | -0.45  | 0.013  | 0.36   | 0.051 | 0.54  | 0.002 | 0.33  | 0.071 | -0.08 | 0.690 | 0.52  | 0.003 |
| <b>TDW</b>                    | -0.61  | 0.000  | 0.73   | 0.000 | 0.92  | 0.000 | -0.30 | 0.110 | 0.47  | 0.010 | 0.66  | 0.000 |
| <b>TF</b>                     | 0.30   | 0.113  | 0.48   | 0.007 | -0.41 | 0.025 | -0.09 | 0.644 | 0.54  | 0.002 | -0.04 | 0.825 |
| <b>TPC</b>                    | 0.65   | 0.000  | 0.10   | 0.614 | -0.24 | 0.206 | 0.33  | 0.071 | 0.37  | 0.042 | -0.56 | 0.001 |
| <b>WCr</b>                    | 0.52   | 0.003  | -0.17  | 0.377 | -0.02 | 0.936 | 0.14  | 0.455 | 0.45  | 0.013 | 0.00  | 0.990 |
| <b>WC<sub>s</sub></b>         | 0.19   | 0.307  | 0.10   | 0.609 | 0.24  | 0.197 | 0.42  | 0.022 | 0.82  | 0.000 | 0.01  | 0.963 |
| <i>Categorical variables</i>  |        |        |        |       |       |       |       |       |       |       |       |       |
| <i>Ageratum houstonianum</i>  | 1.28   | 0.108  | 0.03   | 0.967 | 1.14  | 0.215 | -1.84 | 0.014 | 0.73  | 0.426 | 0.06  | 0.938 |
| <i>Calendula officinalis</i>  | -2.19  | 0.004  | 0.24   | 0.757 | -0.33 | 0.720 | -0.38 | 0.631 | 0.84  | 0.357 | -0.91 | 0.212 |
| <i>Callistephus chinensis</i> | -0.25  | 0.759  | -1.28  | 0.094 | -0.95 | 0.306 | 1.12  | 0.148 | -1.15 | 0.203 | -0.44 | 0.556 |
| <i>Glebionis carinata</i>     | 0.02   | 0.984  | -0.92  | 0.232 | 0.52  | 0.578 | 0.34  | 0.667 | 2.53  | 0.003 | 1.58  | 0.026 |
| <i>Leucanthemum vulgare</i>   | 0.36   | 0.657  | -0.37  | 0.638 | 0.85  | 0.363 | 0.70  | 0.369 | -0.07 | 0.942 | 0.61  | 0.411 |
| <i>Xerochrysum bracteatum</i> | 0.79   | 0.328  | 2.29   | 0.001 | -1.22 | 0.184 | 0.06  | 0.942 | -2.88 | 0.000 | -0.90 | 0.222 |

**Figure S1.** Eigen analysis of PCAcon, PCAiws, and PCAsws

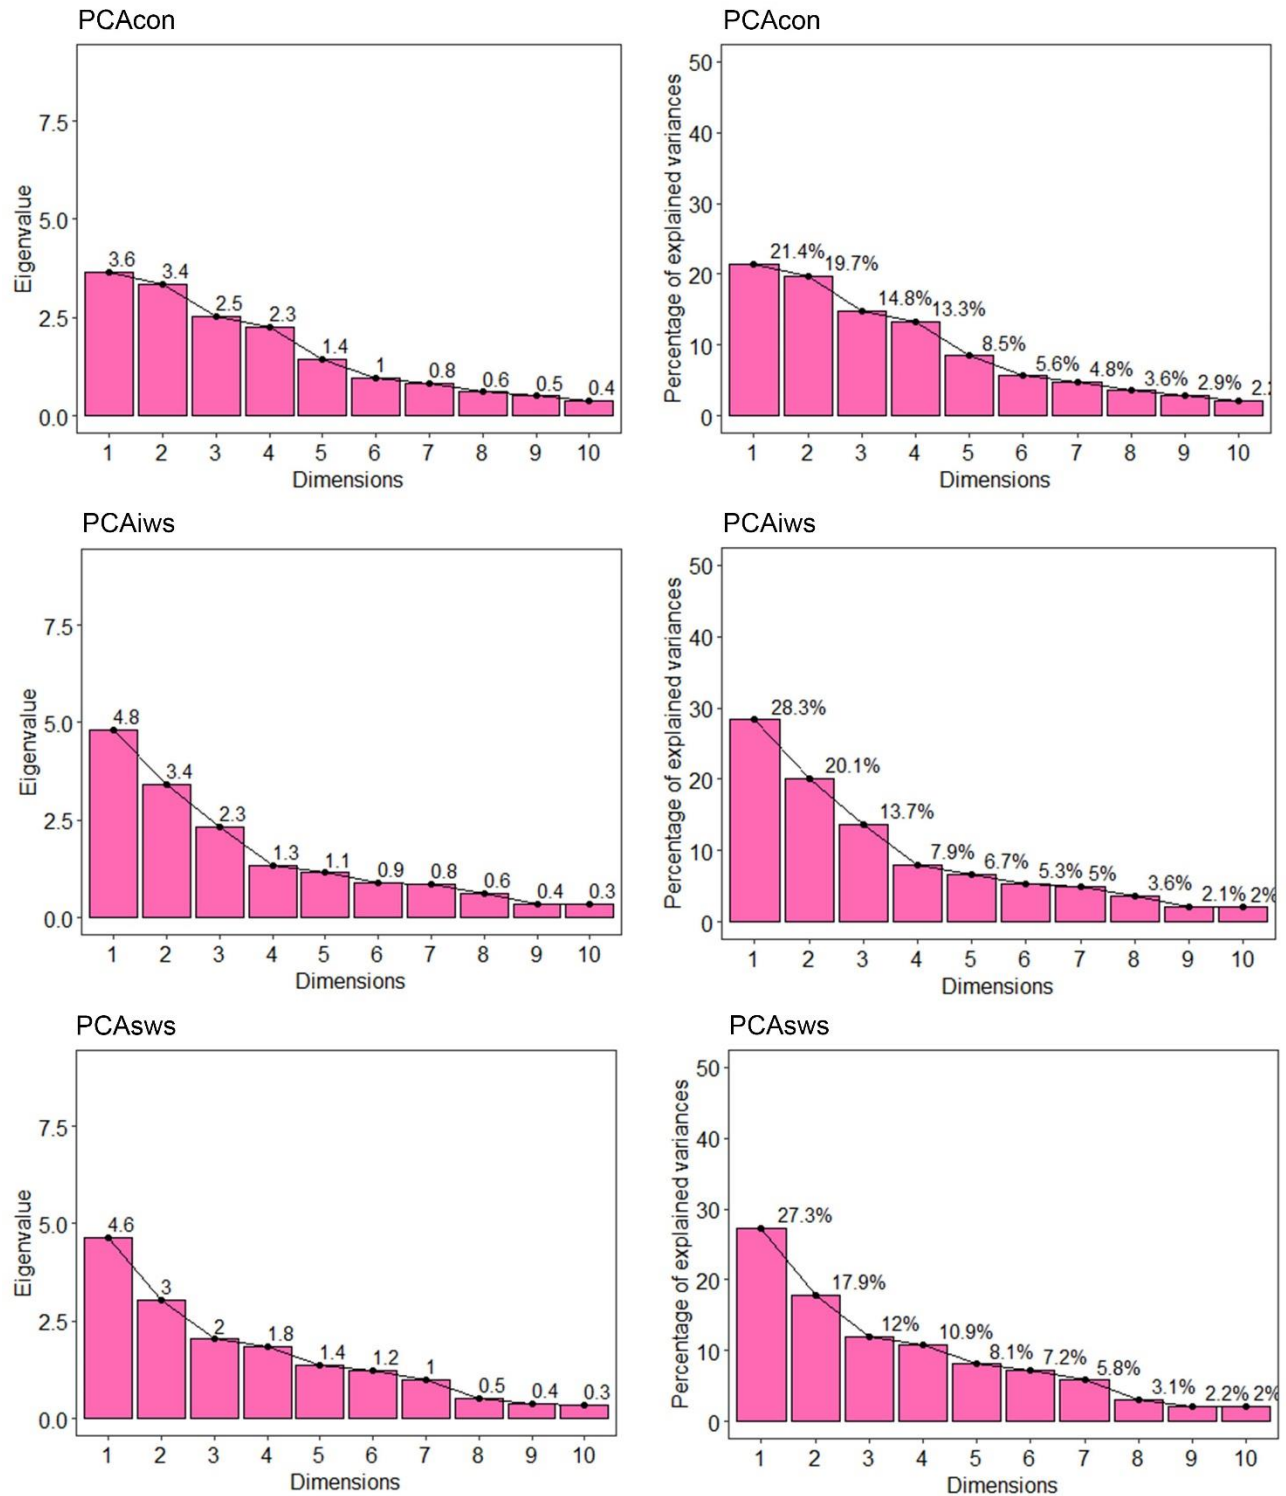

**Table S2.** Coefficients of linear discriminants for CVAcon, CVAiws, and CVAsws

|              | <b>CVAcon</b> |            | <b>CVAiws</b> |            | <b>CVAsws</b> |            |
|--------------|---------------|------------|---------------|------------|---------------|------------|
|              | <b>LD1</b>    | <b>LD2</b> | <b>LD1</b>    | <b>LD2</b> | <b>LD1</b>    | <b>LD2</b> |
| <b>LN</b>    | 0.037         | -0.022     | -0.005        | -0.068     | 0.034         | -0.074     |
| <b>SL</b>    | -0.069        | 0.400      | -0.061        | 0.031      | -0.031        | -0.070     |
| <b>RL</b>    | 0.043         | -0.017     | -0.010        | -0.046     | 0.028         | 0.019      |
| <b>FWr</b>   | 0.384         | -0.041     | 0.143         | 0.038      | -0.269        | 0.132      |
| <b>FWs</b>   | 0.262         | -0.158     | -0.024        | 0.022      | 0.168         | 0.029      |
| <b>DWr</b>   | -3.295        | -0.511     | -0.116        | 0.026      | -0.136        | -0.044     |
| <b>DWs</b>   | 0.580         | 0.463      | 0.014         | 0.032      | -0.181        | 0.017      |
| <b>WCr</b>   | 0.124         | -0.008     | 0.028         | -0.052     | 0.316         | 0.071      |
| <b>WCs</b>   | -0.011        | 0.006      | -0.564        | -0.078     | -0.002        | 0.024      |
| <b>TDW</b>   | -0.586        | 0.060      | 0.037         | -0.018     | -0.057        | -0.066     |
| <b>Chl a</b> | -1.231        | -0.207     | -0.025        | 0.014      | 0.005         | 0.009      |
| <b>Chl b</b> | 1.800         | -0.808     | 0.023         | 0.020      | 0.000         | -0.012     |
| <b>Caro</b>  | 3.336         | 5.611      | 0.002         | -0.010     | 0.002         | 0.000      |
| <b>PRO</b>   | 0.192         | -0.002     | 0.001         | -0.010     | -0.003        | 0.006      |
| <b>MDA</b>   | -0.001        | -0.007     | 0.022         | -0.009     | 0.000         | 0.017      |
| <b>TF</b>    | 0.074         | 0.022      | -0.002        | 0.019      | 0.009         | 0.027      |
| <b>TPC</b>   | 0.029         | 0.031      | -0.002        | 0.020      | -0.004        | -0.038     |
